# Supplementary material for: Effect of light on physicochemical and biological properties of nanocrystalline silver dressings
Source: Royal Society of Chemistry journal article supplement (doi:10.1039/c4ra15745a), 2015-01-01
Supplement: c4ra15745a1.pdf [file c4ra15745a1.pdf]

1 **Supplemental Data**

2

| Variable         | Mean (ppb) |
|------------------|------------|
| CO               | 700        |
| H <sub>2</sub> S | 10.5       |
| NO <sub>2</sub>  | 21.9       |
| SO <sub>2</sub>  | 2.6        |
| O <sub>3</sub>   | 35.7       |

3

4 Table S1. Daily average concentrations of the available ambient air pollutants in  
5 Edmonton, Alberta, Canada (1 April 2008–31 March 2014).

6 Air pollution data were obtained from the Clean Air Strategic Alliance (CASA)  
7 data warehouse (<http://www.envinfo.gov.ab.ca/AQHI/>). Daily mean values of ambient  
8 concentrations of NO<sub>2</sub>, O<sub>3</sub>, CO, and SO<sub>2</sub> were calculated using hourly concentrations  
9 obtained from three continuous monitoring stations within the city of Edmonton. The  
10 monitors are part of the National Air Pollution Surveillance Network maintained by  
11 Environment Canada.

12

| Sample                | no light exposure<br>(5µm scan) | 1 week exposure<br>(5µm scan) | 2 weeks exposure<br>(5µm scan) | 4 weeks exposure<br>(5µm scan) |
|-----------------------|---------------------------------|-------------------------------|--------------------------------|--------------------------------|
| Roughness<br>RMS (nm) | 26 ± 0.2                        | 28 ± 0.5                      | 35 ± 0.02                      | 36.5 ± 0.05                    |

1

2 Table S2. Surface roughness (RMS) of nanocrystalline silver samples as determined  
3 from the AFM experiments.

| Sample            | Ag <sub>2</sub> O (111) |      |                | Ag (111) + Ag <sub>2</sub> O (200) |      |                | Ag (200) |      |                |
|-------------------|-------------------------|------|----------------|------------------------------------|------|----------------|----------|------|----------------|
|                   | 2θ                      | FWHM | Size(nm)       | 2θ                                 | FWHM | Size(nm)       | 2θ       | FWHM | Size(nm)       |
| no light exposure | 38.58                   | 0.58 | 17.66±<br>0.02 | 44.70                              | 0.54 | 19.32±<br>0.01 | 51.99    | 0.71 | 15.18±<br>0.01 |
| 1 week exposure   | 38.51                   | 0.64 | 16.02±<br>0.07 | 44.63                              | 0.52 | 19.91±<br>0.08 | 52.02    | 0.68 | 15.81±<br>0.02 |
| 2 weeks exposure  | 38.49                   | 0.64 | 15.94±<br>0.05 | 44.71                              | 0.54 | 19.36±<br>0.02 | 52.21    | 0.53 | 20.32±<br>0.20 |
| 4 weeks exposure  | 38.66                   | 0.70 | 15.00±<br>0.20 | 44.77                              | 0.47 | 24.20±<br>0.20 | 52.08    | 0.50 | 22.70±<br>0.50 |

Table S3. Quantitative XRD analysis of nanocrystalline silver exposed to light.

1  
2  
3  
4  
5  
6  
7  
8  
9  
10

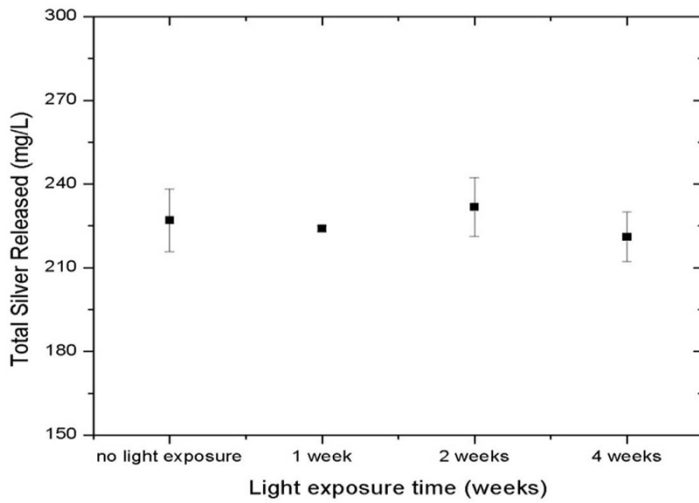

1

2 Figure S1. Variation of total silver content for nanocrystalline silver samples exposed to  
3 light.

4

5

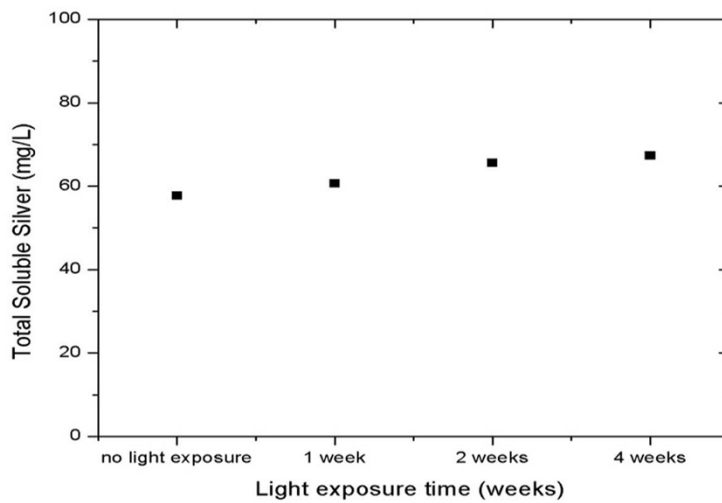

6

7 Figure S2. Variation of soluble silver content for nanocrystalline silver samples exposed  
8 to light.

1

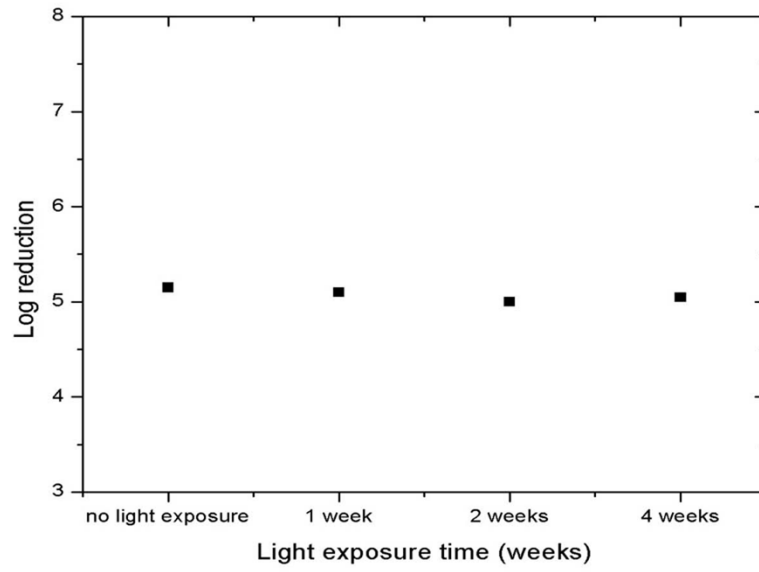

2

3

4

5 Figure S3. Variation in bactericidal efficacy of nanocrystalline silver exposed to light and  
6 comparison to the reference sample.

7

8
